# Supplementary material for: Neonatal Immunization with a Single IL-4/Antigen Dose Induces Increased Antibody Responses after Challenge Infection with Equine Herpesvirus Type 1 (EHV-1) at Weanling Age
Source: PubMed Central journal article supplement (PMC5207648; doi:10.1371/journal.pone.0169072), 2017-01-03

**S1 Figure:** Conjugation and functional testing of the neonatal vaccine components.

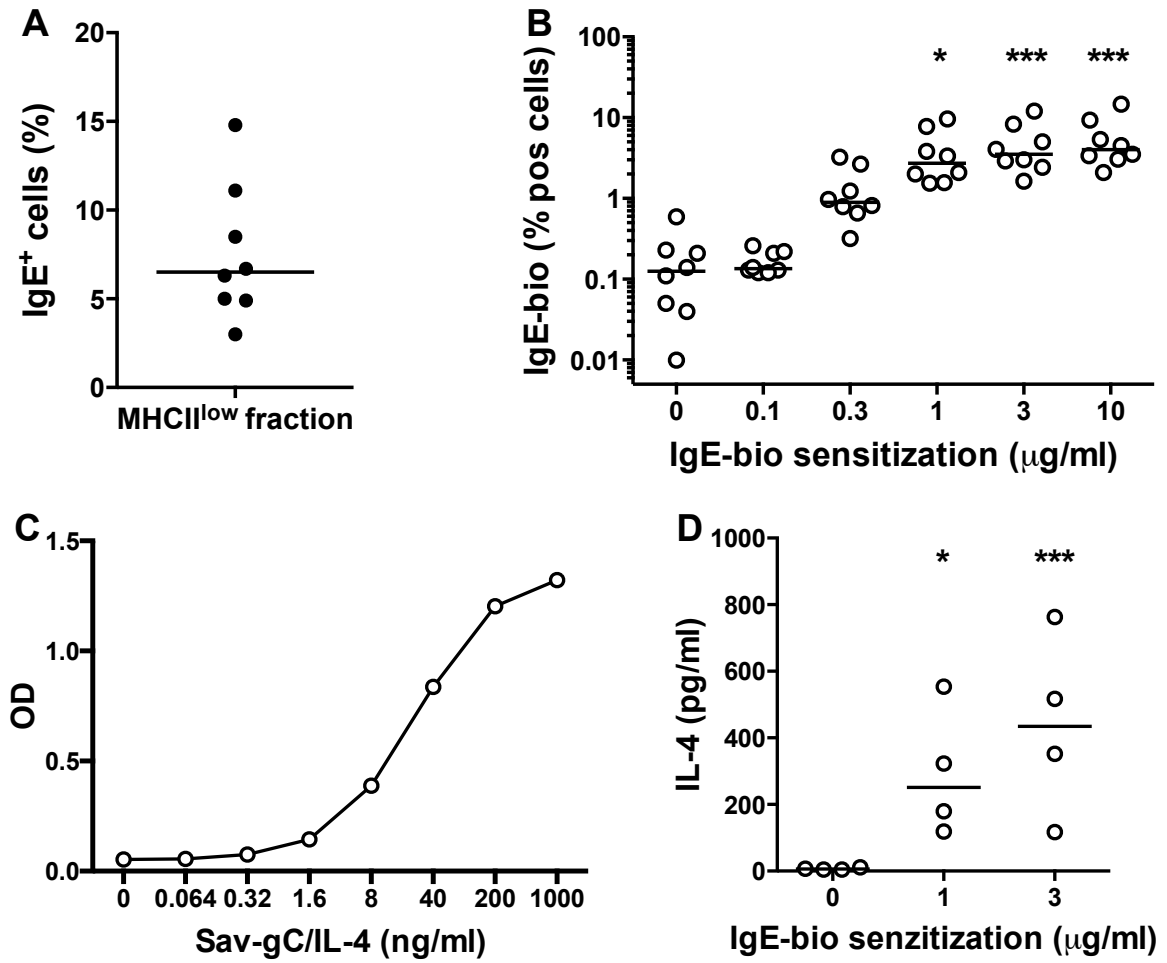

Supplement: pone.0169072.s001.pdf [file pone.0169072.s001.pdf]
